# Supplementary material
Source: PubMed Central journal article supplement (PMC9718804)
Supplement: 41598_2022_25493_MOESM1_ESM.pdf [file 41598_2022_25493_MOESM1_ESM.pdf]

Supplementary data 1- Pulsed-Field Gel Electrophoresis (PFGE) experiment results with uncropped gel images.

Ethidium bromide was used for gel staining and visualization of the results was done using ChemiDoc™ XRS+ System with Image Lab™ Software (BIO-RAD, USA). The isolates labelled as 'X' belongs to either another study group, was discarded due to poor quality for analysis or was test samples for repeatability. As a single run only can be used for testing 13 isolates there were more than 1 run for this experiment for a total of 28 isolates. Repeatability of the experiment was tested by running same isolates on different PFGE runs.

Control ATCC X 24 23 9 7 11 10 17 8 27 26 X Control

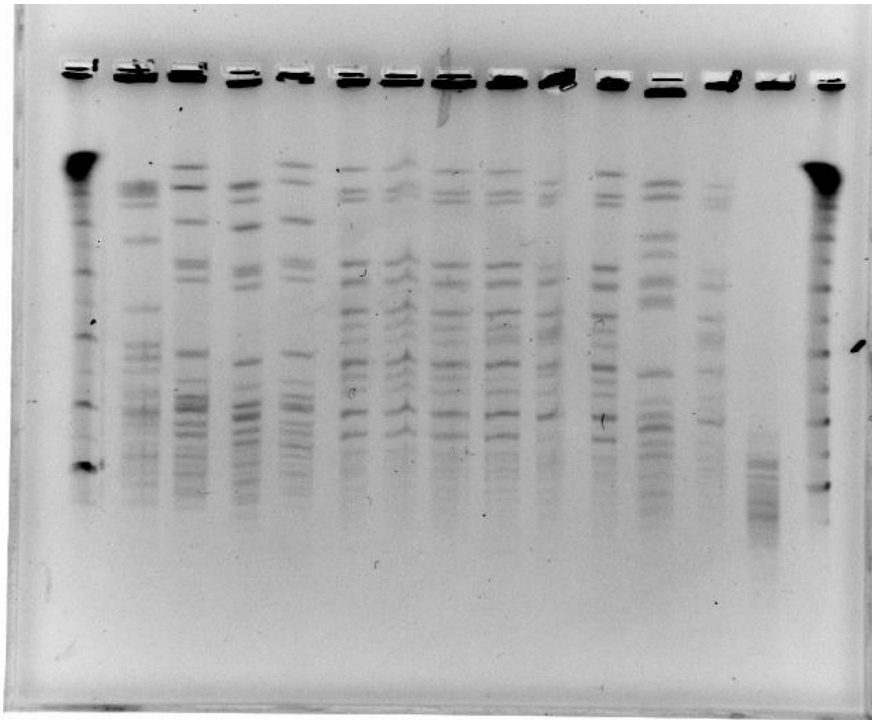

**Supplementary Figure 1** Uncropped gel with Control, ATCC, X, isolate 24, 23, 9, 7, 11, 10, 17, 8, 27, 26, X, Control results respectively.

Control 6 5 21 22 18 19 25 3 20 4 15 16 X Control

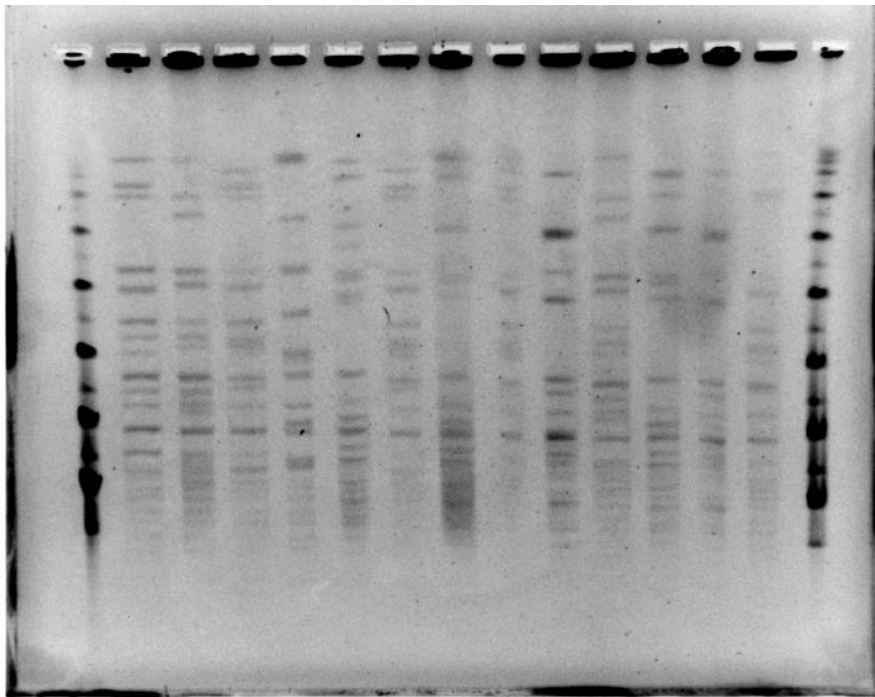

**Supplementary Figure 2.** Illustration of the uncropped gel with Control, isolates 6, 5, 21, 22, 18, 19, 25, 3, 20, 4, 15, 16, X and Control results respectively.

Ctrl 1 14 2 12 13 X X X X X Control

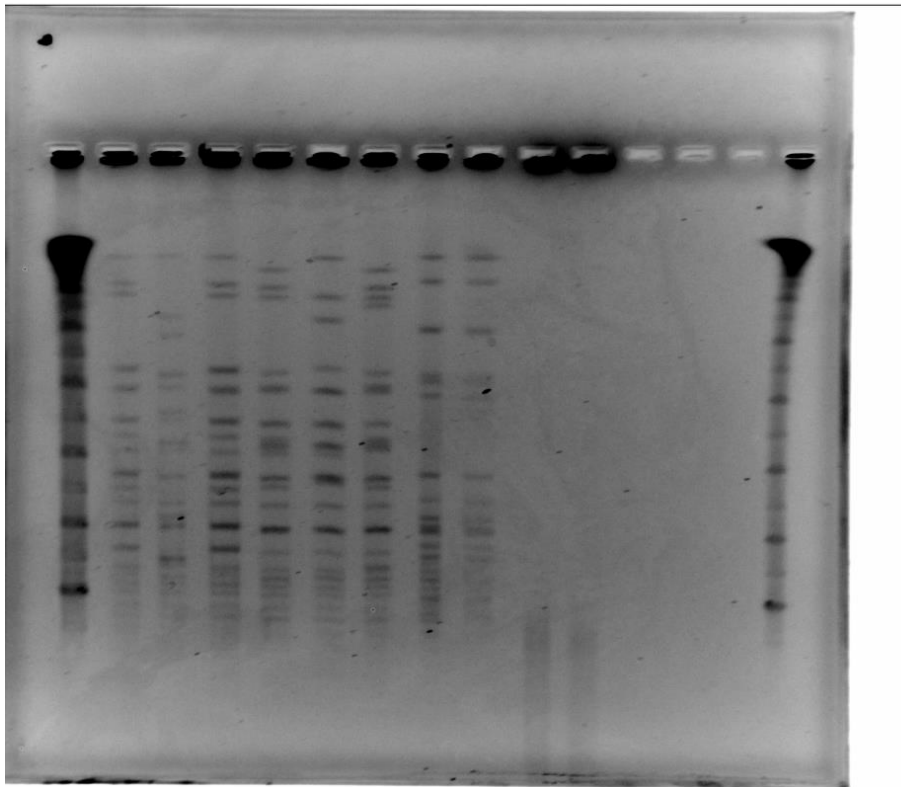

**Supplementary Figure 3.** Illustration of the uncropped gel with Control, isolates 1, 14, 2, 12, 13, X, X, X, X, Blank, Blank, Blank, Control, respectively

### Repeatability test for the PFGE protocol on different runs

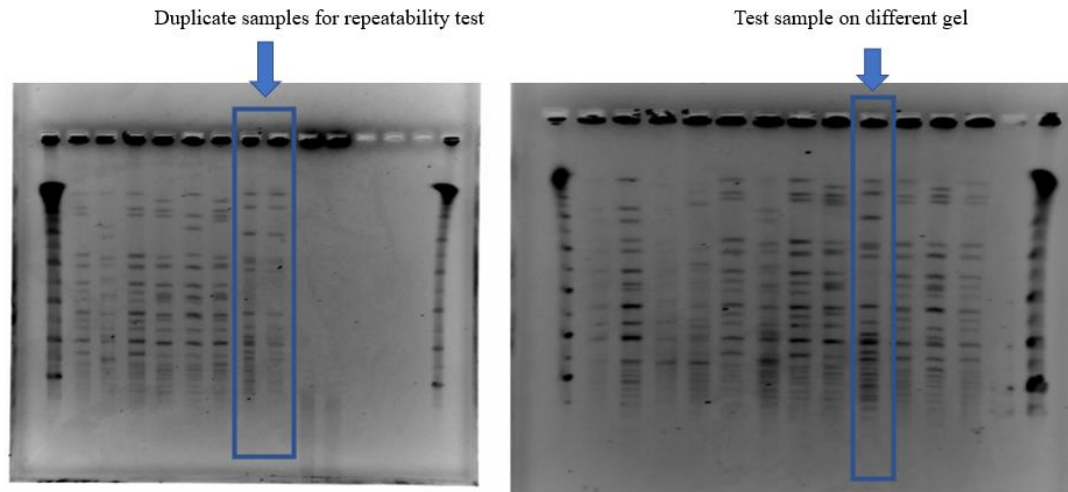

Supplementary Figure 4. Illustration of the same isolate repeated on same PFGE run (in duplicate) and a different run respectively, for the assurance of the repeatability of the protocol.
